# Supplementary material for: A thiourea cross-linked three-dimensional graphene aerogel as a broad-spectrum adsorbent for dye and heavy metal ion removal
Source: Royal Society of Chemistry journal article supplement (doi:10.1039/d0nj03345f), 2020-01-01
Supplement: d0nj03345f1.pdf [file d0nj03345f1.pdf]

**New Journal of Chemistry**

A thiourea cross-linked three-dimensional graphene aerogel as a broad-spectrum adsorbent for dyes and heavy metal ions removal

Yanyan Wang, Xurui Cui, Yuejiao Wang, Weijun Shan, Zhenning Lou, Ying Xiong

College of Chemistry, Key Laboratory of Rare-scattered Elements of Liaoning Province, Liaoning University, Shenyang 110036, P. R. China

**Preparation of aerogels with thiourea dosage below 0.5 g:** Graphene-based aerogels with thiourea dosage below 0.5 g were prepared by a similar route of the TCGA-1 preparation. Firstly, 40 mL of GO-water suspension ( $5 \text{ mg mL}^{-1}$ ) was sonicated to form homogenous dispersions. And then, a certain amount of thiourea (0.1 g or 0.3 g) was added to the dispersions and sonicated for another 10 min at room temperature. Whereafter, the mixture solution was transferred into a 10 mL bottle and hydrothermally treated at  $95 \text{ }^\circ\text{C}$  for 6 h to synthesize the three-dimensional black graphene hydrogel. After cooling to room temperature, the as-prepared hydrogel was washed with 15 % aqueous alcohol several times, followed by freeze-dried to obtain the graphene aerogel.

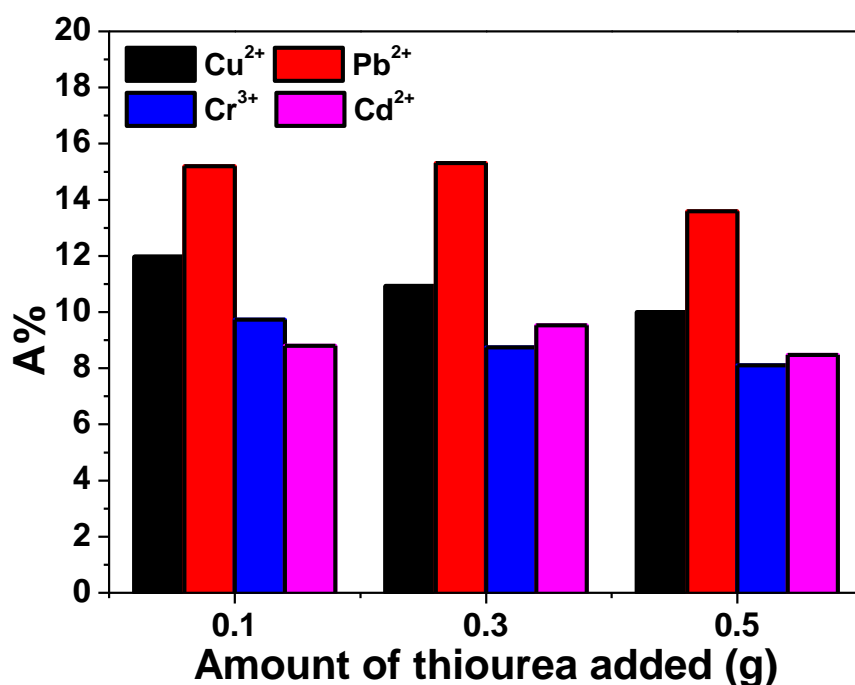

**Figure S1.** Effect of thiourea content on  $\text{Cu}^{2+}$ ,  $\text{Pb}^{2+}$ ,  $\text{Cr}^{3+}$  and  $\text{Cd}^{2+}$  removal by aerogels with thiourea dosage below 0.5 g.
